# Supplementary material for: Rheological Behavior of a New Mucoadhesive Oral Formulation Based on Sodium Chondroitin Sulfate, Xyloglucan and Glycerol
Source: MDPI journal article supplement (doi:10.3390/jfb12020028), 2021-04-28
Supplement: s1 [file s1]

SUPPLEMENTARY MATERIAL

# Rheological Behavior of a New Mucoadhesive Oral Formulation Based on Sodium Chondroitin Sulfate, Xyloglucan and Glycerol

Tiziana Maria Grazia Pecora <sup>1</sup>, Barbara Ragazzo <sup>1</sup>, Walter Bertin <sup>1</sup>, Alessia Ragonese <sup>2</sup>, Marco Mascagni <sup>2</sup>, Paola Maffei <sup>2</sup> and Rosario Pignatello <sup>3,\*</sup>

<sup>1</sup> Labomar SpA, via Nazario Sauro 35/I, Istrana, 31036 Treviso, Italy; tiziana.pecora@labomar.com (T.M.G.P.); barbara.ragazzo@labomar.com (B.R.); walter.bertin@labomar.com (W.B.)

<sup>2</sup> Alfagma SpA, via Ragazzi del '99, 40133 Bologna, Italy; alessia.ragonese@alfagma.com (A.R.); Marco.Mascagni@alfagma.com (M.M.); paola.maffei@alfagma.com (P.M.)

<sup>3</sup> Department of Drug and Health Sciences, University of Catania, viale A. Doria, 6, 95125 Catania, Italy

\* Correspondence: r.pignatello@unict.it

**Table S1.** Gradient elution scheme for HPLC caffeine determination.

| Time (min) | % 1:1 Acetonitrile/Methanol | % Water (+ 10 mM Ammonium Acetate) |
|------------|-----------------------------|------------------------------------|
| 0          | 20                          | 80                                 |
| 7          | 20                          | 80                                 |
| 10         | 80                          | 20                                 |
| 15         | 80                          | 20                                 |
| 17         | 20                          | 80                                 |
| 20         | 20                          | 80                                 |

**Table 2.** Composition of the tested formulations.

|                              | AL2023 | AL2104 | AL2103 | AL2105 | AL2106 | AL2100 | AL2101 | AL2102 |
|------------------------------|--------|--------|--------|--------|--------|--------|--------|--------|
| Chondroitin sulfate sodium   | ✓      | ✓      | ✓      | ✓      | ✓      | ✓      | ✓      | ✓      |
| Xilogel                      | ✓      | ✓      | ✓      | ✓      | ✓      | ✓      | ✓      | ✓      |
| Glycerol                     | ✓      | ✓      | ✓      | ✓      | ✓      | ✓      | ✓      | ✓      |
| Sodium bicarbonate           | ✓      | ✓      | ✓      | ✓      | ✓      | ✓      | ✓      | ✓      |
| Xanthan gum                  | ✓      | ✓      | ✓      | ✓      | ✓      | ✓      | ✓      | ✓      |
| Xylitol                      | ✓      | ✓      | ✓      | ✓      | ✓      | ✓      | ✓      | ✓      |
| Sodium benzoate              | ✓      | ✓      | ✓      | ✓      | ✓      | ✓      | ✓      | ✓      |
| Natural orange flavouring    | ✓      | ✓      | ✓      | ✓      | ✓      | ✓      | ✓      | ✓      |
| Citric acid, anhydrous       | ✓      | ✓      | ✓      | ✓      | ✓      | ✓      | ✓      | ✓      |
| Potassium sorbate            | ✓      | ✓      | ✓      | ✓      | ✓      | ✓      | ✓      | ✓      |
| EDTA                         | -      | -      | -      | -      | ✓      | ✓      | ✓      | ✓      |
| Water                        | ✓      | ✓      | ✓      | ✓      | ✓      | ✓      | ✓      | ✓      |
| Poloxamer 407                | -      | ✓      | -      | -      | -      | -      | ✓      | -      |
| Polyvinylpyrrolidone PVP K30 | -      | ✓      | -      | ✓      | -      | -      | ✓      | ✓      |
| Hydroxypropylmethylcellulose | -      | -      | ✓      | ✓      | ✓      | ✓      | -      | ✓      |

**Table S3.** Composition of the Esoxx One formulation.

| Esoxx® One                 |
|----------------------------|
| Chondroitin sulfate sodium |
| Sodium hyaluronate         |
| Poloxamer 407              |
| Sodium bicarbonate         |
| Polyvinylpyrrolidone       |
| Xylitol                    |
| Sodium benzoate            |
| Flavouring                 |
| Potassium sorbate          |
| Water                      |

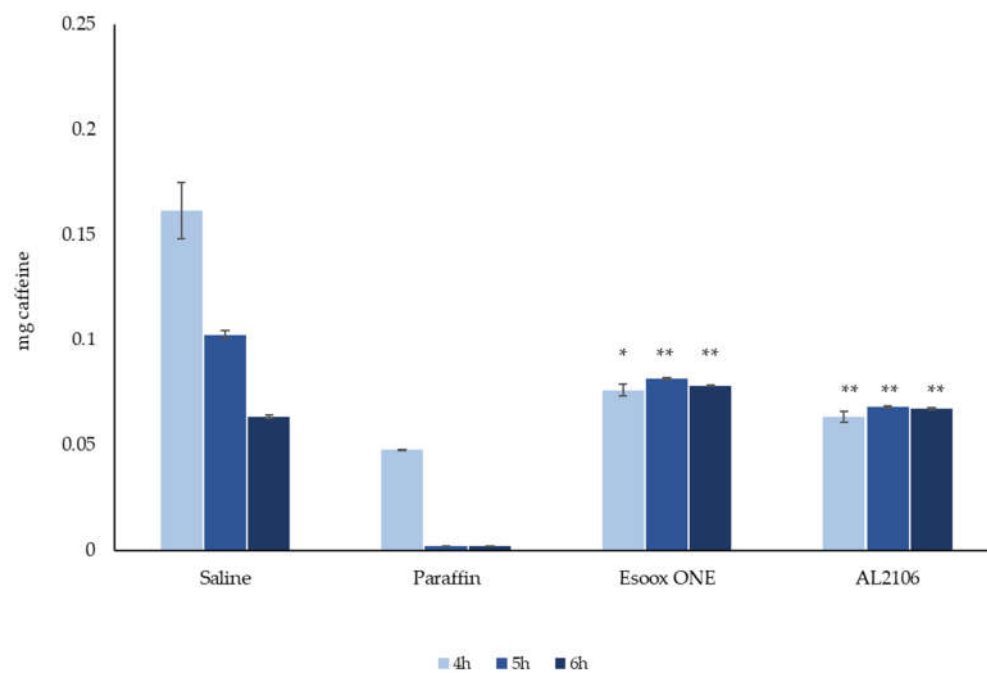**Figure S1.** Quantification of caffeine in the basolateral receptor fluid after 4, 5 and 6 h from the application (mean  $\pm$  S.D. of six replicates). Statistical significance was set at \*  $p < 0.005$  or \*\*  $p < 0.0005$  vs. saline.

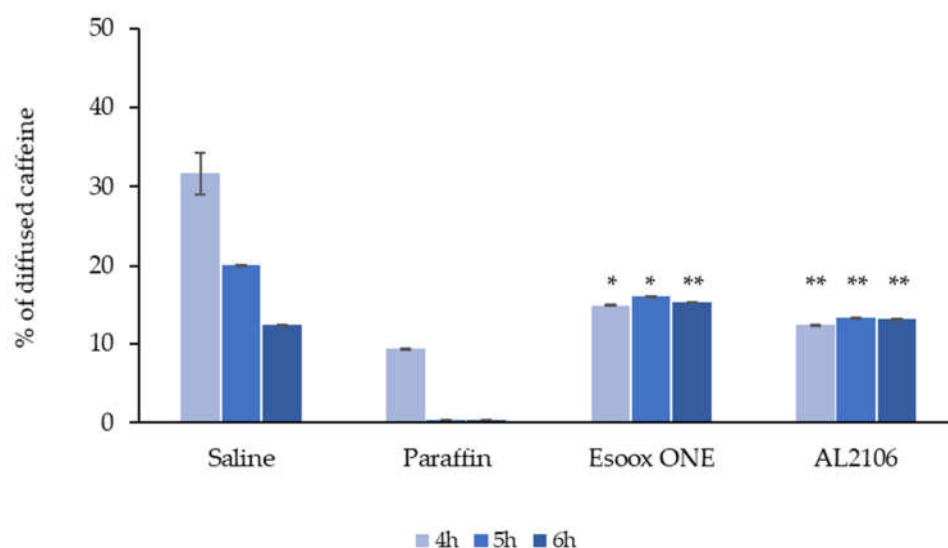

**Figure S2.** Amount of caffeine (mean  $\pm$  S.D. of six replicates) diffused in the basolateral receptor fluid after 4, 5 and 6 h from the application, expressed as the percentage of the applied dose (0.51 mg). Statistical significance was set at \*  $p < 0.005$  or \*\*  $p < 0.0005$  vs. saline.

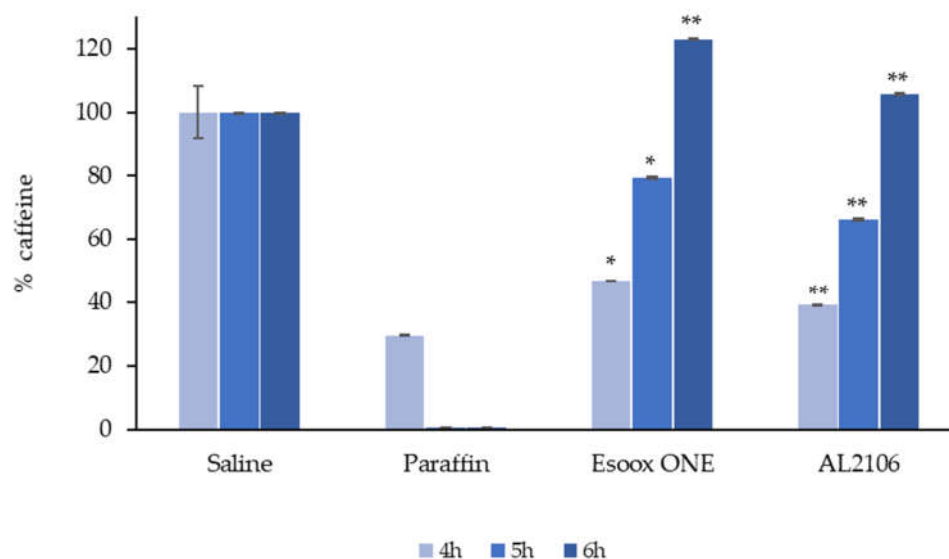

**Figure S3.** Diffusion of caffeine in the basolateral receptor fluid after 4, 5 and 6 h from the application, expressed as a percentage vs. negative control (saline) (mean  $\pm$  S.D. of six replicates). Statistical significance was set at \*  $p < 0.005$  or \*\*  $p < 0.0005$  vs. saline.
